# Supplementary material for: Aggressive multiple sclerosis (2): Treatment
Source: PubMed Central journal article supplement — Mult Scler. 2020 Jun 12;26(9):1045–63. doi: 10.1177/1352458520924595 (PMC7412878; doi:10.1177/1352458520924595), 2020-06-12
Supplement: MSJ924595_supplemental_table_1.pdf [file MSJ924595_supplemental_table_1.pdf]

**Supplementary Table 1.** List of attendees of the 2018 Focused Workshop on Aggressive MS, supported by ECTRIMS.

| <b>Name</b> | <b>Surname</b> | <b>Country</b> | <b>e-mail</b>                                   |
|-------------|----------------|----------------|-------------------------------------------------|
| Maria Pia   | Amato          | IT             | mariapia.amato@unifi.it                         |
| Georgina    | Arrambide      | ES             | garrambide@cem-cat.org                          |
| Joseph      | Berger         | US             | joseph.berger@uphs.upenn.edu                    |
| Alexey      | Boyko          | RU             | boykoan13@gmail.com                             |
| Vesna       | Brinar         | CR             | vesna.brinar@gmail.com                          |
| Wallace     | Brownlee       | UK             | w.brownlee@ucl.ac.uk                            |
| Lou         | Brundin        | SE             | lou.brundin@ki.se                               |
| Olga        | Ciccarelli     | UK             | o.ciccarelli@ucl.ac.uk                          |
| Alasdair    | Coles          | UK             | ajc1020@medschl.cam.ac.uk                       |
| Jorge       | Correale       | AR             | jcorreale@fleni.org.ar                          |
| Gary        | Cutter         | US             | cutterg@uab.edu                                 |
| Tobias      | Derfuss        | CH             | Tobias.Derfuss@usb.ch                           |
| Gilles      | Edan           | FR             | gilles.edan@chu-rennes.fr                       |
| Nikolaos    | Evangelou      | UK             | nikos.evangelou@nottingham.ac.uk                |
| Oscar       | Fernandez      | ES             | oscar.fernandez.sspa@gmail.com                  |
| Jette       | Frederiksen    | DK             | jette.lautrup.frederiksen.battistini@regionh.dk |
| Ralf        | Gold           | DE             | ralf.gold@rub.de                                |
| Yael        | Hacohen        | UK             | y.hacohen@ucl.ac.uk                             |
| Hans-Peter  | Hartung        | DE             | hans-peter.hartung@uni-duesseldorf.de           |
| Kerstin     | Hellwig        | DE             | k.hellwig@klinikum-bochum.de                    |
| Bernhard    | Hemmer         | DE             | hemmer@tum.de                                   |

|            |                      |    |                                     |
|------------|----------------------|----|-------------------------------------|
| Jan        | Hillert              | SE | jan.hillert@ki.se                   |
| Ellen      | Iacobaeus            | SE | ellen.iacobaeus@sll.se              |
| Jaime      | Imitola              | US | imitola@uchc.edu                    |
| Tomas      | Kalincik             | AU | tomas.kalincik@unimelb.edu.au       |
| Ludwig     | Kappos               | CH | kapposl-pa@usb.ch                   |
| Samia      | Khoury               | LB | sk88@aub.edu.lb                     |
| Ho Jin     | Kim                  | KR | hojinkim@ncc.re.kr                  |
| Eva        | Kubala<br>Havrdová   | CZ | ehavr@lf1.cuni.cz                   |
| Roland     | Liblau               | FR | roland.liblau@inserm.fr             |
| Jan        | Lycke                | SE | jan.lycke@neuro.gu.se               |
| Xavier     | Montalban            | ES | xavier.montalban@cem-cat.org        |
| Paolo      | Muraro               | UK | p.muraro@imperial.ac.uk             |
| Stephen    | Reingold             | US | scra.llc@earthlink.net              |
| Klaus      | Schmierer            | UK | k.schmierer@qmul.ac.uk              |
| Finn       | Sellebjerg           | DK | sellebjerg@dadlnet.dk               |
| Per        | Soelberg<br>Sørensen | DK | Per.Soelberg.Soerensen@regionh.dk   |
| Alessandra | Solari               | IT | alessandra.solari@istituto-besta.it |
| Maria Pia  | Sormani              | IT | mariapia.sormani@unige.it           |
| Alan       | Thompson             | UK | alan.thompson@ucl.ac.uk             |
| Mar        | Tintore              | ES | mtintore@cem-cat.org                |
| Bruce      | Trapp                | US | TRAPPB@ccf.org                      |
| Helen      | Tremlett             | CA | helen.tremlett@ubc.ca               |
| Maria      | Trojano              | IT | maria.trojano@uniba.it              |
| Carmen     | Tur                  | UK | c.tur@ucl.ac.uk                     |
| Antonio    | Uccelli              | IT | aucelli@neurologia.unige.it         |

|            |           |    |                               |
|------------|-----------|----|-------------------------------|
| Vincent    | van Pesch | BE | vincent.vanpesch@uclouvain.be |
| Sandra     | Vukusic   | FR | sandra.vukusic@chu-lyon.fr    |
| Emmanuelle | Waubant   | US | Emmanuelle.Waubant@ucsf.edu   |
