# Supplementary material for: Aggressive multiple sclerosis (2): Treatment
Source: PubMed Central journal article supplement — Mult Scler. 2020 Jun 12;26(9):1045–63. doi: 10.1177/1352458520924595 (PMC7412878; doi:10.1177/1352458520924595), 2020-06-12
Supplement: MSJ924595_supplemental_table_2.pdf [file MSJ924595_supplemental_table_2.pdf]

**Supplementary Table 2.** Serious adverse events related to high efficacy DMTs.

| Treatment             | Adverse events                                                                                                                                                                                                                                                                                                                                                                                                                                                              |
|-----------------------|-----------------------------------------------------------------------------------------------------------------------------------------------------------------------------------------------------------------------------------------------------------------------------------------------------------------------------------------------------------------------------------------------------------------------------------------------------------------------------|
| Dimethyl fumarate     | <ul style="list-style-type: none"> <li>- PML risk Class II<sup>1</sup></li> </ul>                                                                                                                                                                                                                                                                                                                                                                                           |
| Fingolimod            | <ul style="list-style-type: none"> <li>- PML risk Class II<sup>1</sup></li> <li>- Herpetic infections<sup>2</sup></li> <li>- Other opportunistic infections<sup>3</sup></li> <li>- Skin cancer, lymphomas</li> </ul>                                                                                                                                                                                                                                                        |
| Cladribine            | <ul style="list-style-type: none"> <li>- PML risk unknown, probably class III in MS<sup>1,4</sup></li> <li>- Herpetic infections<sup>2</sup></li> <li>- Tuberculosis reactivation</li> <li>- Cancer: more frequent in the cladribine arm than in the placebo arm, but similar to the general population</li> </ul>                                                                                                                                                          |
| Natalizumab           | <ul style="list-style-type: none"> <li>- PML risk Class I<sup>1</sup></li> <li>- PML-IRIS<sup>5</sup></li> <li>- Herpetic infections</li> </ul>                                                                                                                                                                                                                                                                                                                             |
| Alemtuzumab           | <ul style="list-style-type: none"> <li>- PML risk Class III?<sup>1,6</sup></li> <li>- Herpetic infections<sup>2</sup>, including CMV</li> <li>- Tuberculosis reactivation</li> <li>- Lysteria meningitis</li> <li>- Other opportunistic infections</li> <li>- HPV and cervical dysplasia</li> <li>- Cardiovascular (stroke, heart infarction, arterial dissection)<sup>7</sup></li> <li>- Liver injury<sup>8</sup></li> <li>- Secondary autoimmunity<sup>8</sup></li> </ul> |
| Ocrelizumab/rituximab | <ul style="list-style-type: none"> <li>- PML risk Class III for rituximab<sup>1</sup>, carry-over from natalizumab/fingolimod to ocrelizumab<sup>9</sup></li> <li>- Hepatitis B reactivation</li> </ul>                                                                                                                                                                                                                                                                     |

|       |                                                                                                                                                                                                                                             |
|-------|---------------------------------------------------------------------------------------------------------------------------------------------------------------------------------------------------------------------------------------------|
|       | <ul style="list-style-type: none"> <li>- Hypogammaglobulinemia</li> <li>- Cancer: more common in ocrelizumab arm than in control arms, but similar to the general population (breast cancer)</li> <li>- Neutropenia<sup>10</sup></li> </ul> |
| aHSCT | <ul style="list-style-type: none"> <li>- Opportunistic infections</li> <li>- Secondary autoimmunity<sup>11</sup></li> </ul>                                                                                                                 |

Abbreviations: PML: progressive multifocal leukoencephalopathy; MS: multiple sclerosis; IRIS: immune reconstitution inflammatory syndrome; HPV: human papillomavirus.

## References, supplemental material:

1. Berger JR. Classifying PML risk with disease modifying therapies. *Mult Scler Relat Disord* 2017; 12: 59-63.
2. Faissner S and Gold R. Efficacy and Safety of the Newer Multiple Sclerosis Drugs Approved Since 2010. *CNS Drugs* 2018; 32(3): 269-287.
3. Winkelmann A, Loebermann M, Reisinger EC, et al. Disease-modifying therapies and infectious risks in multiple sclerosis. *Nat Rev Neurol* 2016; 12(4): 217-233.
4. Berghoff M, Schanzer A, Hildebrandt GC, et al. Development of progressive multifocal leukoencephalopathy in a patient with non-Hodgkin lymphoma 13 years after treatment with cladribine. *Leuk Lymphoma* 2013; 54(6): 1340-1342.
5. Tan IL, McArthur JC, Clifford DB, et al. Immune reconstitution inflammatory syndrome in natalizumab-associated PML. *Neurology* 2011; 77(11): 1061-1067.
6. Gerevini S, Capra R, Bertoli D, et al. Immune profiling of a patient with alemtuzumab-associated progressive multifocal leukoencephalopathy. *Mult Scler* 2019; 1352458519832259.
7. McCall B. Alemtuzumab to be restricted pending review, says EMA. *Lancet* 2019; 393(10182): 1683.
8. Soleimani B, Murray K and Hunt D. Established and Emerging Immunological Complications of Biological Therapeutics in Multiple Sclerosis. *Drug Saf* 2019; 42(8): 941-956.
9. Kadish R, Robertson D and Sweeney M. Fatal leukoencephalopathy in a patient with multiple sclerosis following treatment with ocrelizumab (P5.353). *Neurology* 2018; 90(15 (Supplement)): P5.353.
10. Cohen BA. Late-onset neutropenia following ocrelizumab therapy for multiple sclerosis. *Neurology* 2019; 92(9): 435-436.
11. Loh Y, Oyama Y, Statkute L, et al. Development of a secondary autoimmune disorder after hematopoietic stem cell transplantation for autoimmune diseases: role of conditioning regimen used. *Blood* 2007; 109(6): 2643-2548.
